# Supplementary material for: The ancestor of extant Japanese fancy mice contributed to the mosaic genomes of classical inbred strains
Source: HighWire-hosted journal article supplement (doi:10.1101/gr.156497.113), 2013-04-19
Supplement: Supplemental_Figure_Legends.docx [file Supplemental_Figure_Legends.docx]

**Supplemental Figure S1.** Venn diagrams showing the total numbers of SNPs and short indels detected by comparing the sequences of the MSM and JF1 strains to the reference B6 sequence (MGSC37).

**Supplemental Figure S2.** Venn diagrams showing the total numbers of novel SNPs detected as a result of comparison to the MGP dataset and dbSNP128, excluding data from the SPRET/EiJ strain of the MGP.

**Supplemental Figure S3.** The size distribution of short indels (1-6 bp) detected by comparing the MSM and JF1 sequences to the reference B6 sequence. The number of indels was plotted using BWA prediction for indels of varying size (≤6 bp).

**Supplemental Figure S4.** We calculated the ratio of the number of 100-kb blocks with high (>99.85%) similarity in the MSM and JF1 genomes to the total number of 100-kb blocks in the reference B6 genome (MGSC37). We also calculated the ratio of cumulative non-repeat nucleotide sequences in the 100-kb blocks with high (>99.85%) similarity to the MSM and JF1 genomes to the total non-repeat sequence of the reference B6 genome. The rate of reverse genome introgression from *M. m. domesticus* into the JF1 genome was calculated to be 0.75%. This value was estimated by subtracting the ratio of 100-kb blocks with high (>99.85%) sequence similarity to MSM from the ratio of that to JF1.

**Supplemental Figure S5.** The distribution of 100-kb blocks with high (>99.85%) similarity to the MSM and JF1 genomes in the MGP dataset (Keane *et al.* 2012) of 17 inbred strains.

**Supplemental Figure S6.** Fine-scale phylogenetic discordance determined using whole-genome sequence information from MSM, WSB SPRET mice and the rat. The posterior probability of each topology is mapped onto chromosomes 1 to 19 and X to characterize the fine-scale patterns of discordance among the 124,174 loci. The colors correspond to the 3 topologies (shown in the box).

**Supplemental Figure S7.** Genomic partitioning of the phylogenetic history. Bayesian concordance factors were estimated from 124,174 individual locus trees. For 94.6% of the loci, SPRET/EiJ (*M. spretus*) mice and rats are placed as outgroups of the subspecies *M. musculus*. Within *M. musculus,* 10.1% of loci were supported with higher posterior probability of a single B6/MSM topology, and 85.2% of loci supported a single WSB/B6 topology (higher posterior probability).

**Supplemental Figure S8.** Distribution plots of the nucleotide sequence similarity between B6 and MSM or JF1 with respect to MDRs defined by BCA (Fig. S7). Each plot shows the sequence similarity between the B6 and MSM strains (horizontal axis) and between the B6 and JF1 strains (vertical axis).

**Supplemental Figure S9.** Distribution of sequence blocks with high (>99.85% per 100 kb) similarity to the MSM and JF1 sequences for each of the 17 MGP strains (Keane *et al.* 2012). The data from wild-derived inbred strains were eliminated. Reference data for the comparisons between the B6 (MGSC37) and MSM or JF1 strains, which were derived from Figure 3B, are denoted above each chromosome. Gray boxes depict gaps in the B6 reference sequence.

**Supplemental Figure S10.** The ratio of the number of *M. m. molossinus*-derived SNPs to the total number of SNPs in pairs of classical inbred strains. We calculated the number of SNPs between the classical inbred strains that reside in regions with high sequence similarity to the MSM genome.
